# Supplementary material for: Asparagine Metabolism in Tumors Is Linked to Poor Survival in Females with Colorectal Cancer: A Cohort Study
Source: MDPI journal article supplement (doi:10.3390/metabo12020164), 2022-02-09
Supplement: s1 [file s1]

## Supplementary materials

**Table S1.** Demographic characteristics and clinical factors for each subgroup.

| Subgroup                                                   |           | Stage I (n=47) |            | Stage II (n=86) |            | Stage III (n=64) |            |
|------------------------------------------------------------|-----------|----------------|------------|-----------------|------------|------------------|------------|
|                                                            |           | RCC (n=22)     | LCC (n=25) | RCC (n=44)      | LCC (n=42) | RCC (n=32)       | LCC (n=32) |
| <b>Sex, n</b>                                              | Males     | 10             | 15         | 23              | 25         | 15               | 14         |
|                                                            | Females   | 12             | 10         | 21              | 17         | 17               | 18         |
| <b>Age, y, mean (SD)</b>                                   | Males     | 73.9 (6.5)     | 69.3 (5.8) | 72.9 (7.8)      | 72.2 (8.5) | 73.5 (7.8)       | 63.7 (5.8) |
|                                                            | Females   | 72.1 (6.2)     | 69.6 (7.6) | 73.5 (9.8)      | 69.1 (7.8) | 72.2 (6.6)       | 71.1 (6.0) |
| <b>Race/Ethnicity, n</b>                                   | NHWs      | 20             | 22         | 40              | 37         | 26               | 25         |
|                                                            | Hispanic  | 2              | 3          | 2               | 3          | 4                | 2          |
|                                                            | AA        | 0              | 0          | 1               | 0          | 1                | 4          |
|                                                            | API       | 0              | 0          | 1               | 2          | 1                | 1          |
| <b>KRAS mutation, n</b>                                    | Wild type | 7              | 14         | 24              | 21         | 16               | 19         |
|                                                            | Mutant    | 8              | 8          | 12              | 13         | 10               | 9          |
|                                                            | Unknown   | 7              | 3          | 8               | 8          | 6                | 4          |
| <b>BRAF mutation, n</b>                                    | Wild type | 13             | 19         | 20              | 30         | 18               | 27         |
|                                                            | Mutant    | 0              | 0          | 9               | 1          | 8                | 0          |
|                                                            | Unknown   | 9              | 6          | 15              | 11         | 6                | 5          |
| <b>Microsatellite instability status, n</b>                | MSS       | 10             | 16         | 17              | 27         | 15               | 17         |
|                                                            | MSI       | 5              | 4          | 17              | 4          | 10               | 8          |
|                                                            | Unknown   | 7              | 5          | 10              | 11         | 7                | 7          |
| <b>5-year Overall survival rate, %<sup>a</sup></b>         | Males     | 87.5           | 85.1       | 76.5            | 74.1       | 47.1             | 78.6       |
|                                                            | Females   | 100            | 100        | 82.9            | 100        | 65.2             | 61.8       |
| <b>5-year Recurrence-free survival rate, %<sup>a</sup></b> | Males     | 90.0           | 78.3       | 86.8            | 67.6       | 82.1             | 70.1       |
|                                                            | Females   | 90.9           | 100.0      | 87.5            | 87.4       | 76.0             | 68.8       |

RCC: right-sided colon cancer, LCC: left-sided colon cancer, NHWs: non-Hispanic whites, AA: African-Americans, API: Asian-Pacific Islander, MSI: microsatellite instable, MSS; microsatellite stable. <sup>a</sup> The survival rates were calculated using the Kaplan-Meier estimation method.

**Table S2.** Prognosis of patients in early stage (Stage I and II) vs late stage (Stage III).

| 5-year Overall Survival (OS)          |           |    |             |   |           |    |             |   |
|---------------------------------------|-----------|----|-------------|---|-----------|----|-------------|---|
| Subgroup                              | RCC males |    | RCC females |   | LCC males |    | LCC females |   |
| Event <sup>a</sup>                    | 0         | 1  | 0           | 1 | 0         | 1  | 0           | 1 |
| Early stage <sup>b</sup>              | 28        | 5  | 30          | 3 | 32        | 8  | 27          | 0 |
| Late stage <sup>c</sup>               | 8         | 7  | 12          | 5 | 11        | 3  | 12          | 6 |
| Total                                 | 36        | 12 | 42          | 8 | 43        | 11 | 39          | 6 |
| 5-year Recurrence-free Survival (RFS) |           |    |             |   |           |    |             |   |
| Subgroup                              | RCC males |    | RCC females |   | LCC males |    | LCC females |   |
| Event <sup>d</sup>                    | 0         | 1  | 0           | 1 | 0         | 1  | 0           | 1 |
| Early stage <sup>b</sup>              | 30        | 3  | 30          | 3 | 32        | 8  | 25          | 2 |
| Late stage <sup>c</sup>               | 13        | 2  | 14          | 3 | 10        | 4  | 13          | 5 |
| Total                                 | 43        | 5  | 44          | 6 | 42        | 12 | 38          | 7 |

<sup>a</sup> Event = death. Event =1 represents that death occurred within 5 years of follow-up, and event = 0 indicates the event did not occur within 5 years of follow-up (survived or scored as censored). <sup>b</sup> Early stage combines stage I and II together. <sup>c</sup> Late stage refers to stage III. <sup>d</sup> Event = recurrence. Event = 1 indicates that recurrence occurred within 5 years of follow-up, event = 0 indicates that recurrence did not occur within 5 years of follow-up. If a patient died before CRC recurrence occurred, it is counted towards a death event.

Notes:

If a patient died for any reason without recurrence within 5 years of follow-up, it is only counted toward a death event in OS.

If a patient experienced recurrence but did not die within 5 years of follow-up, it is only counted toward a recurrence event in RFS.

If a patient experienced recurrence and then died within 5 years of follow-up, it is counted toward a recurrence event in RFS and a death event in OS.

If a patient experienced neither recurrence nor death within 5 years of follow-up, the event is 0 for both OS and RFS.

Due to the absence of death events in females of clinical stage I, we regarded stage I and II as early stage, and stage III as late stage.

**Table S3.** Multivariate analyses of the associations between individual metabolites and 5-year OS by sex, adjusted for anatomic location, chemotherapy history, clinical stages, and age.

| Metabolite name       | Females |            |                             | Males |           |                             | Int. Sex <i>P</i> value <sup>b</sup> |
|-----------------------|---------|------------|-----------------------------|-------|-----------|-----------------------------|--------------------------------------|
|                       | HR      | 95% CI     | <i>P</i> value <sup>a</sup> | HR    | 95% CI    | <i>P</i> value <sup>a</sup> |                                      |
| <b>Acetyl-lysine</b>  | 0.97    | 0.75–1.25  | 0.809                       | 0.82  | 0.71–0.96 | 0.012                       | 0.298                                |
| Adenosine             | 0.90    | 0.69–1.17  | 0.421                       | 1.29  | 1.03–1.62 | 0.026                       | 0.038                                |
| Alanine               | 1.06    | 0.78–1.44  | 0.705                       | 0.77  | 0.61–0.98 | 0.034                       | 0.092                                |
| Argininosuccinic acid | 0.93    | 0.71–1.23  | 0.629                       | 0.74  | 0.58–0.93 | 0.010                       | 0.151                                |
| Asparagine            | 1.51    | 0.89–2.57  | 0.127                       | 0.72  | 0.54–0.96 | 0.025                       | 0.026                                |
| Carnitine             | 0.61    | 0.04–9.10  | 0.717                       | 0.53  | 0.30–0.94 | 0.031                       | 0.897                                |
| Citrulline            | 1.66    | 0.97–2.83  | 0.065                       | 0.65  | 0.46–0.92 | 0.014                       | 0.002                                |
| Glycerol 3-phosphate  | 3.64    | 1.26–10.49 | 0.017                       | 0.91  | 0.47–1.77 | 0.777                       | 0.018                                |
| Hypoxanthine          | 1.05    | 0.35–3.14  | 0.929                       | 0.65  | 0.44–0.95 | 0.027                       | 0.441                                |
| LysoPC(16:0)          | 1.52    | 1.03–2.25  | 0.035                       | 0.85  | 0.65–1.11 | 0.242                       | 0.009                                |
| Ornithine             | 0.97    | 0.56–1.66  | 0.904                       | 0.68  | 0.47–0.97 | 0.035                       | 0.310                                |
| Serine                | 1.25    | 0.65–2.41  | 0.497                       | 0.55  | 0.37–0.81 | 0.002                       | 0.035                                |
| Spermine              | 1.49    | 1.04–2.13  | 0.031                       | 1.03  | 0.83–1.27 | 0.811                       | 0.073                                |
| Succinate             | 0.35    | 0.12–0.99  | 0.047                       | 1.91  | 1.23–2.96 | 0.004                       | 0.004                                |
| Threonine             | 1.12    | 0.67–1.87  | 0.670                       | 0.61  | 0.44–0.85 | 0.004                       | 0.035                                |
| UDP-D-Glucose         | 0.81    | 0.67–0.97  | 0.025                       | 1.16  | 0.95–1.41 | 0.152                       | 0.010                                |
| Uracil                | 1.24    | 0.56–2.76  | 0.599                       | 0.42  | 0.26–0.69 | 0.001                       | 0.024                                |
| Xanthosine            | 1.22    | 0.86–1.73  | 0.266                       | 0.71  | 0.54–0.94 | 0.016                       | 0.028                                |

<sup>a</sup> *P* values for the association between individual metabolites and 5-year OS calculated by multivariate Cox PH regression models, adjusted for anatomic location, clinical stages, chemotherapy history and age (before FDR adjustment). The abundance of each metabolite was treated as a continuous variable and was log<sub>2</sub> transformed. A metabolite with HR < 1 was associated with better OS; a metabolite with HR > 1 was associated with worse OS. <sup>b</sup> *P* value of the interaction between the metabolite and sex. Int. Sex *P* value < .05 indicate a significant sex interaction.

**Table S4.** Multivariate analyses of the associations between individual metabolites and 5-year RFS by sex, adjusted for anatomic location, chemotherapy history, clinical stages, and age.

| Metabolite name         | Females |            |                             | Males |           |                             | Int. Sex <i>P</i> value <sup>b</sup> |
|-------------------------|---------|------------|-----------------------------|-------|-----------|-----------------------------|--------------------------------------|
|                         | HR      | 95% CI     | <i>P</i> value <sup>a</sup> | HR    | 95% CI    | <i>P</i> value <sup>a</sup> |                                      |
| <b>Acetyl-lysine</b>    | 0.98    | 0.76–1.26  | 0.855                       | 0.78  | 0.67–0.92 | 0.002                       | 0.076                                |
| Alanine                 | 1.12    | 0.81–1.55  | 0.495                       | 0.74  | 0.58–0.94 | 0.013                       | 0.053                                |
| AMP                     | 1.10    | 0.69–1.77  | 0.689                       | 0.69  | 0.51–0.95 | 0.021                       | 0.124                                |
| Argininosuccinic acid   | 1.03    | 0.79–1.35  | 0.825                       | 0.70  | 0.54–0.92 | 0.011                       | 0.036                                |
| Asparagine              | 1.54    | 0.93–2.56  | 0.093                       | 0.74  | 0.56–0.97 | 0.031                       | 0.007                                |
| Carnitine               | 3.52    | 0.25–50.41 | 0.354                       | 0.37  | 0.20–0.66 | 0.001                       | 0.117                                |
| CMP                     | 0.97    | 0.57–1.65  | 0.906                       | 0.70  | 0.50–0.96 | 0.029                       | 0.287                                |
| Creatinine              | 0.75    | 0.42–1.32  | 0.317                       | 1.70  | 1.15–2.51 | 0.008                       | 0.040                                |
| Cytidine                | 0.46    | 0.28–0.75  | 0.002                       | 0.75  | 0.49–1.16 | 0.194                       | 0.134                                |
| Fructose 6-phosphate    | 0.84    | 0.55–1.28  | 0.414                       | 0.68  | 0.49–0.95 | 0.026                       | 0.534                                |
| Glutamine               | 0.77    | 0.26–2.30  | 0.642                       | 0.47  | 0.23–0.97 | 0.041                       | 0.338                                |
| Glutathione             | 0.73    | 0.56–0.95  | 0.019                       | 0.92  | 0.79–1.06 | 0.246                       | 0.302                                |
| Glutathione disulfide   | 0.72    | 0.57–0.91  | 0.006                       | 0.81  | 0.67–0.98 | 0.034                       | 0.092                                |
| GMP                     | 1.04    | 0.69–1.58  | 0.838                       | 0.74  | 0.57–0.96 | 0.024                       | 0.169                                |
| Hypoxanthine            | 1.95    | 0.59–6.45  | 0.276                       | 0.32  | 0.20–0.51 | <0.001                      | 0.008                                |
| LysoPC(16:1)            | 1.06    | 0.76–1.49  | 0.729                       | 0.77  | 0.61–0.97 | 0.025                       | 0.106                                |
| LysoPE(18:2)            | 1.07    | 0.70–1.65  | 0.750                       | 0.72  | 0.55–0.96 | 0.023                       | 0.127                                |
| LysoPE(20:1)            | 0.98    | 0.77–1.24  | 0.856                       | 0.83  | 0.70–0.98 | 0.031                       | 0.225                                |
| LysoPE(22:5)            | 1.09    | 0.70–1.70  | 0.701                       | 0.70  | 0.53–0.92 | 0.010                       | 0.072                                |
| Serine                  | 1.45    | 0.74–2.84  | 0.282                       | 0.57  | 0.40–0.83 | 0.003                       | 0.010                                |
| Sphinganine-1-phosphate | 0.94    | 0.60–1.47  | 0.777                       | 0.66  | 0.45–0.95 | 0.026                       | 0.216                                |
| Stearamide              | 0.92    | 0.63–1.36  | 0.674                       | 0.70  | 0.53–0.92 | 0.012                       | 0.211                                |
| Threonine               | 0.98    | 0.58–1.64  | 0.929                       | 0.64  | 0.46–0.89 | 0.007                       | 0.074                                |
| Xanthine                | 0.62    | 0.38–1.01  | 0.053                       | 0.69  | 0.48–0.98 | 0.036                       | 0.869                                |
| Xanthosine              | 1.01    | 0.72–1.40  | 0.973                       | 0.71  | 0.52–0.98 | 0.040                       | 0.112                                |

<sup>a</sup> *P* values for the association between individual metabolites and 5-year RFS calculated by multivariate Cox PH regression models, adjusted for anatomic location, clinical stages, chemotherapy history and age (before FDR adjustment). The abundance of each metabolite was treated as a continuous variable and was log<sub>2</sub> transformed. A metabolite with HR < 1 was associated with better RFS; a metabolite with HR > 1 was associated with worse RFS. <sup>b</sup> *P* value of the interaction between the metabolite and sex. Int. Sex *P* value < .05 indicate a significant sex interaction.

**Table S5.** Multivariate analysis of association between metabolites in ASNS-catalyzed asparagine synthesis pathway and OS and RFS for all patients .

| Variable <sup>a</sup>              | OS          |                  |              |                               | RFS         |                  |              |                               |
|------------------------------------|-------------|------------------|--------------|-------------------------------|-------------|------------------|--------------|-------------------------------|
|                                    | HR          | 95% CI           | P value      | Int. Sex P value <sup>b</sup> | HR          | 95% CI           | P value      | Int. Sex P value <sup>b</sup> |
| <b>Asparagine</b>                  | <b>0.89</b> | <b>0.61–1.29</b> | <b>0.535</b> | <b>0.021</b>                  | <b>1.27</b> | <b>0.84–1.92</b> | <b>0.251</b> | <b>0.003</b>                  |
| Aspartate                          | 1.25        | 0.85–1.84        | 0.257        | 0.639                         | 1.31        | 0.86–2.00        | 0.202        | 0.237                         |
| Glutamate                          | 0.93        | 0.45–1.90        | 0.837        | 0.808                         | 0.93        | 0.44–1.97        | 0.841        | 0.064                         |
| Glutamine                          | 0.86        | 0.35–2.08        | 0.734        | 0.974                         | 0.37        | 0.16–0.87        | 0.023        | 0.285                         |
| AMP                                | 0.83        | 0.64–1.06        | 0.135        | 0.860                         | 0.75        | 0.57–0.98        | 0.034        | 0.295                         |
| Sex = Male (ref: Female)           | 2.01        | 1.00–4.05        | 0.051        | –                             | 1.12        | 0.53–2.38        | 0.761        | –                             |
| Anatomic location = RCC (ref: LCC) | 0.87        | 0.43–1.77        | 0.710        | –                             | 0.67        | 0.31–1.44        | 0.300        | –                             |
| Clinical stage = late (ref: early) | 4.48        | 2.26–9.24        | 0.003        | –                             | 1.91        | 0.63–5.79        | 0.252        | –                             |
| Chemotherapy = Yes (ref: No)       | 1.03        | 0.38–2.76        | 0.956        | –                             | 1.26        | 0.41–3.86        | 0.685        | –                             |
| Age                                | 1.10        | 1.05–1.15        | <0.001       | –                             | 0.97        | 0.92–1.03        | 0.304        | –                             |

<sup>a</sup> All the variables listed were included in one multivariate Cox PH model where the abundance of each metabolite was treated as a continuous variable and was log<sub>2</sub> transformed. <sup>b</sup> P value of the interaction between the metabolite and sex.

**Table S6.** Multivariate analysis of association between metabolites in ASNS-catalyzed asparagine synthesis metabolic pathway and OS and RFS by sex.

| Variable <sup>a</sup>              | OS      |             |         |       |            |         | RFS     |            |         |       |           |         |
|------------------------------------|---------|-------------|---------|-------|------------|---------|---------|------------|---------|-------|-----------|---------|
|                                    | Females |             |         | Males |            |         | Females |            |         | Males |           |         |
|                                    | HR      | 95% CI      | P value | HR    | 95% CI     | P value | HR      | 95% CI     | P value | HR    | 95% CI    | P value |
| Asparagine                         | 6.39    | 1.78–22.91  | 0.004   | 0.57  | 0.36–0.91  | 0.018   | 4.36    | 1.39–13.68 | 0.012   | 0.96  | 0.61–1.50 | 0.856   |
| Aspartate                          | 1.47    | 0.64–3.40   | 0.365   | 1.32  | 0.75–2.32  | 0.339   | 1.60    | 0.71–4.05  | 0.239   | 1.40  | 0.79–2.50 | 0.252   |
| Glutamate                          | 0.24    | 0.06–0.95   | 0.042   | 1.28  | 0.48–3.38  | 0.618   | 0.76    | 0.19–3.11  | 0.705   | 0.75  | 0.28–2.02 | 0.573   |
| Glutamine                          | 0.16    | 0.03–1.06   | 0.057   | 1.18  | 0.39–3.54  | 0.772   | 0.10    | 0.02–0.57  | 0.010   | 0.52  | 0.17–1.63 | 0.266   |
| AMP                                | 0.65    | 0.31–1.37   | 0.252   | 0.89  | 0.65–1.22  | 0.476   | 0.59    | 0.25–1.36  | 0.214   | 0.70  | 0.49–1.00 | 0.049   |
| Anatomic location = RCC (ref: LCC) | 1.63    | 0.47–5.65   | 0.438   | 0.80  | 0.31–2.10  | 0.653   | 0.78    | 0.23–2.65  | 0.692   | 0.61  | 0.20–1.84 | 0.380   |
| Clinical stage = late (ref: early) | 14.90   | 2.19–101.43 | 0.006   | 6.02  | 1.39–26.06 | 0.016   | 1.92    | 0.34–10.99 | 0.462   | 1.29  | 0.23–7.09 | 0.771   |
| Chemotherapy = Yes (ref: No)       | 1.78    | 0.39–8.23   | 0.458   | 0.74  | 0.18–2.99  | 0.676   | 2.34    | 0.38–14.29 | 0.358   | 1.01  | 0.19–5.24 | 0.991   |
| Age                                | 1.09    | 1.00–1.19   | 0.037   | 1.15  | 1.07–1.23  | <0.001  | 1.01    | 0.91–1.11  | 0.905   | 0.94  | 0.87–1.01 | 0.112   |

<sup>a</sup> All the variables listed were included in one multivariate Cox PH model. The abundance of each metabolite was treated as a continuous variable and was log<sub>2</sub> transformed.

**Table S7.** Multivariate analysis of association between metabolites in PPP and glycolysis metabolic pathway and OS and RFS for all patients .

| Variable <sup>a</sup>              | OS          |                  |                      |                               | RFS         |                  |                      |                               |
|------------------------------------|-------------|------------------|----------------------|-------------------------------|-------------|------------------|----------------------|-------------------------------|
|                                    | HR          | 95% CI           | P value <sup>a</sup> | Int. Sex P value <sup>b</sup> | HR          | 95% CI           | P value <sup>a</sup> | Int. Sex P value <sup>b</sup> |
| <b>Ribulose 5-phosphate</b>        | <b>1.18</b> | <b>0.84–1.65</b> | <b>0.354</b>         | <b>0.934</b>                  | <b>1.33</b> | <b>0.89–1.99</b> | <b>0.164</b>         | 0.263                         |
| Lactate                            | 1.49        | 0.81–2.75        | 0.203                | 0.601                         | 1.21        | 0.51–2.85        | 0.660                | 0.472                         |
| DHAPorG3P                          | 1.21        | 0.72–2.03        | 0.479                | 0.214                         | 0.99        | 0.57–1.71        | 0.975                | 0.137                         |
| Glucose 6-phosphate                | 0.95        | 0.67–1.35        | 0.775                | 0.817                         | 1.30        | 0.90–1.87        | 0.156                | 0.110                         |
| Fructose 6-phosphate               | 0.68        | 0.42–1.10        | 0.114                | 0.899                         | 0.46        | 0.27–0.78        | 0.004                | 0.615                         |
| Glycerol 3-phosphate               | 1.44        | 0.80–2.59        | 0.222                | 0.046                         | 0.53        | 0.25–1.12        | 0.097                | 0.253                         |
| Phosphoenolpyruvate                | 1.05        | 0.83–1.35        | 0.670                | 0.241                         | 1.17        | 0.84–1.61        | 0.358                | 0.418                         |
| Sex = Male (ref: Female)           | 1.95        | 0.97–3.90        | 0.060                | –                             | 1.33        | 0.64–2.78        | 0.442                | –                             |
| Anatomic location = RCC (ref: LCC) | 0.65        | 0.29–1.42        | 0.279                | –                             | 0.83        | 0.36–1.93        | 0.665                | –                             |
| Clinical stage = late (ref: early) | 4.24        | 1.58–11.42       | 0.004                | –                             | 1.53        | 0.46–5.14        | 0.491                | –                             |
| Chemotherapy = Yes (ref: No)       | 1.01        | 0.36–2.85        | 0.980                | –                             | 1.63        | 0.47–5.72        | 0.442                | –                             |
| Age                                | 1.11        | 1.06–1.16        | <0.001               | –                             | 0.99        | 0.93–1.04        | 0.596                | –                             |

<sup>a</sup> All the variables listed were included in one multivariate Cox PH model where the abundance of each metabolite was treated as a continuous variable and was log<sub>2</sub> transformed. <sup>b</sup> P value of the interaction between the metabolite and sex.

**Table S8.** Multivariate analysis of association between metabolites in PPP and glycolysis metabolic pathway and OS and RFS by sex.

| Variable <sup>a</sup>              | OS                 |         |                   |         | RFS               |         |                  |         |
|------------------------------------|--------------------|---------|-------------------|---------|-------------------|---------|------------------|---------|
|                                    | Females            |         | Males             |         | Females           |         | Males            |         |
|                                    | HR (95% CI)        | P value | HR (95% CI)       | P value | HR (95% CI)       | P value | HR (95% CI)      | P value |
| Ribulose 5-phosphate               | 1.30 (0.72–2.35)   | 0.388   | 1.09 (0.70–1.69)  | 0.700   | 1.87 (0.96–3.65)  | 0.068   | 1.13 (0.63–2.03) | 0.673   |
| Lactate                            | 1.63 (0.45–5.98)   | 0.460   | 1.02 (0.45–2.34)  | 0.960   | 1.17 (0.26–5.18)  | 0.839   | 0.92 (0.28–3.00) | 0.885   |
| DHAPorG3P                          | 2.20 (0.75–6.48)   | 0.153   | 0.91 (0.48–1.75)  | 0.785   | 1.35 (0.51–3.56)  | 0.550   | 0.94 (0.45–1.98) | 0.879   |
| Glucose 6-phosphate                | 0.93 (0.48–1.81)   | 0.842   | 0.86 (0.51–1.43)  | 0.553   | 1.90 (1.00–3.58)  | 0.048   | 0.74 (0.44–1.24) | 0.254   |
| Fructose 6-phosphate               | 0.77 (0.32–1.87)   | 0.570   | 0.96 (0.50–1.82)  | 0.890   | 0.26 (0.11–0.64)  | 0.003   | 0.72 (0.37–1.42) | 0.344   |
| Glycerol 3-phosphate               | 2.94 (0.86–9.99)   | 0.084   | 0.89 (0.42–1.88)  | 0.760   | 0.79 (0.27–2.28)  | 0.664   | 0.27 (0.08–0.88) | 0.029   |
| Phosphoenolpyruvate                | 1.16 (0.69–1.93)   | 0.572   | 0.96 (0.70–1.33)  | 0.817   | 1.54 (0.85–2.77)  | 0.154   | 0.98 (0.63–1.53) | 0.940   |
| Anatomic location = RCC (ref: LCC) | 1.01 (0.27–3.80)   | 0.993   | 0.58 (0.17–1.91)  | 0.367   | 1.03 (0.27–3.94)  | 0.968   | 0.80 (0.23–2.78) | 0.728   |
| Clinical stage = late (ref: early) | 13.00 (1.96–86.35) | 0.008   | 3.36 (0.87–13.02) | 0.080   | 2.00 (0.20–19.67) | 0.551   | 0.99 (0.18–5.34) | 0.994   |
| Chemotherapy = Yes (ref: No)       | 0.75 (0.13–4.43)   | 0.753   | 0.99 (0.23–4.20)  | 0.987   | 1.65 (0.16–16.89) | 0.675   | 1.21 (0.24–6.12) | 0.816   |
| Age                                | 1.08 (0.98–1.20)   | 0.132   | 1.12 (1.05–1.19)  | 0.001   | 1.01 (0.92–1.10)  | 0.832   | 0.92 (0.84–1.00) | 0.064   |

<sup>a</sup> All the variables listed were included in one multivariate Cox PH model. The abundance of each metabolite was treated as a continuous variable and was log<sub>2</sub> transformed.



**Table S9.** Multivariate analysis of association between metabolites in lysophospholipids synthesis and OS and RFS for all patients .

| Variable <sup>a</sup>              | OS                      |                             |                                      | RFS                     |                             |                                      |
|------------------------------------|-------------------------|-----------------------------|--------------------------------------|-------------------------|-----------------------------|--------------------------------------|
|                                    | HR (95% CI)             | <i>P</i> value <sup>a</sup> | Int. Sex <i>P</i> value <sup>b</sup> | HR (95% CI)             | <i>P</i> value <sup>a</sup> | Int. Sex <i>P</i> value <sup>b</sup> |
| <b>Oleic acid</b>                  | <b>1.13 (0.82–1.56)</b> | <b>0.457</b>                | <b>0.271</b>                         | <b>1.33 (0.94–1.89)</b> | <b>0.107</b>                | 0.472                                |
| L-Palmitoylcarnitine               | 1.25 (0.76–2.06)        | 0.378                       | 0.784                                | 2.64 (1.43–4.86)        | 0.002                       | 0.481                                |
| Stearoylcarnitine                  | 0.84 (0.64–1.09)        | 0.190                       | 0.900                                | 0.76 (0.56–1.04)        | 0.089                       | 0.595                                |
| Carnitine                          | 0.52 (0.22–1.23)        | 0.137                       | 0.681                                | 0.29 (0.11–0.78)        | 0.014                       | 0.098                                |
| LysoPC(16:0)                       | 1.22 (0.83–1.80)        | 0.306                       | 0.002                                | 0.87 (0.44–1.72)        | 0.691                       | 0.233                                |
| LysoPC(16:1)                       | 0.68 (0.39–1.20)        | 0.183                       | 0.153                                | 1.18 (0.61–2.28)        | 0.626                       | 0.376                                |
| LysoPC(18:1)                       | 0.75 (0.40–1.41)        | 0.364                       | 0.018                                | 1.07 (0.53–2.14)        | 0.854                       | 0.447                                |
| LysoPE(16:0)                       | 1.66 (0.69–3.99)        | 0.253                       | 0.088                                | 4.38 (1.75–10.97)       | 0.002                       | 0.443                                |
| LysoPE(16:1)                       | 0.98 (0.56–1.72)        | 0.940                       | 0.675                                | 0.70 (0.33–1.49)        | 0.358                       | 0.720                                |
| LysoPE(18:0)                       | 0.84 (0.37–1.90)        | 0.674                       | 0.027                                | 1.04 (0.47–2.29)        | 0.924                       | 0.283                                |
| LysoPE(18:1)                       | 0.88 (0.31–2.50)        | 0.817                       | 0.275                                | 0.36 (0.13–1.00)        | 0.051                       | 0.595                                |
| LysoPE(20:1)                       | 1.08 (0.70–1.65)        | 0.740                       | 0.205                                | 1.04 (0.64–1.69)        | 0.875                       | 0.334                                |
| LysoPE(22:5)                       | 0.88 (0.41–1.93)        | 0.758                       | 0.042                                | 0.50 (0.24–1.07)        | 0.073                       | 0.052                                |
| LysoPE(18:2)                       | 1.52 (0.84–2.77)        | 0.167                       | 0.467                                | 0.99 (0.49–1.98)        | 0.970                       | 0.395                                |
| Sex = Male (ref: Female)           | 2.30 (1.07–4.92)        | 0.032                       | –                                    | 1.58 (0.73–3.43)        | 0.250                       | –                                    |
| Anatomic location = RCC (ref: LCC) | 0.59 (0.26–1.35)        | 0.213                       | –                                    | 0.74 (0.28–1.92)        | 0.532                       | –                                    |
| Clinical stage = late (ref: early) | 4.02 (1.42–11.38)       | 0.009                       | –                                    | 3.70 (1.26–10.84)       | 0.017                       | –                                    |
| Chemotherapy = Yes (ref: No)       | 1.42 (0.48–4.16)        | 0.523                       | –                                    | 0.91 (0.30–2.72)        | 0.862                       | –                                    |
| Age                                | 1.11 (1.06–1.16)        | <0.001                      | –                                    | 0.96 (0.90–1.02)        | 0.174                       | –                                    |

Abbreviation: LysoPC, lysophosphatidylcholine; LysoPE, lysophosphatidylethanolamine. <sup>a</sup> All the variables listed were included in one multivariate Cox PH model where the abundance of each metabolite was treated as a continuous variable and was log<sub>2</sub> transformed. <sup>b</sup> *P* value of the interaction between the metabolite and sex.

**Table S10.** Multivariate analysis of association between metabolites in lysophospholipids synthesis and OS and RFS by sex.

| Variable <sup>a</sup> | OS                 |                |                    |                | RFS                |                |                   |                |
|-----------------------|--------------------|----------------|--------------------|----------------|--------------------|----------------|-------------------|----------------|
|                       | Females            |                | Males              |                | Females            |                | Males             |                |
|                       | HR (95% CI)        | <i>P</i> value | HR (95% CI)        | <i>P</i> value | HR (95% CI)        | <i>P</i> value | HR (95% CI)       | <i>P</i> value |
| Oleic acid            | 1.05 (0.50–2.20)   | 0.905          | 1.66 (1.02–2.69)   | 0.041          | 2.27 (0.95–5.44)   | 0.065          | 0.91 (0.53–1.57)  | 0.728          |
| L-Palmitoylcarnitine  | 1.55 (0.61–3.89)   | 0.355          | 2.99 (1.03–8.69)   | 0.044          | 3.93 (1.29–12.04)  | 0.016          | 1.79 (0.57–5.64)  | 0.323          |
| Stearoylcarnitine     | 0.65 (0.41–1.05)   | 0.076          | 0.60 (0.34–1.05)   | 0.074          | 0.60 (0.37–0.99)   | 0.047          | 0.75 (0.42–1.34)  | 0.329          |
| Carnitine             | 6.83 (0.11–431.17) | 0.363          | 0.19 (0.06–0.67)   | 0.009          | 5.84 (0.08–435.95) | 0.422          | 0.19 (0.03–1.03)  | 0.054          |
| LysoPC(16:0)          | 2.07 (1.06–4.07)   | 0.034          | 0.64 (0.27–1.54)   | 0.319          | 1.06 (0.37–3.04)   | 0.920          | 0.43 (0.08–2.21)  | 0.313          |
| LysoPC(16:1)          | 0.39 (0.11–1.37)   | 0.144          | 0.52 (0.22–1.27)   | 0.151          | 2.71 (0.66–11.17)  | 0.169          | 0.86 (0.27–2.70)  | 0.798          |
| LysoPC(18:1)          | 1.56 (0.43–5.75)   | 0.501          | 0.29 (0.08–1.00)   | 0.050          | 0.41 (0.10–1.65)   | 0.210          | 7.82 (1.30–47.16) | 0.025          |
| LysoPE(16:0)          | 1.66 (0.35–7.95)   | 0.524          | 12.72 (2.20–73.55) | 0.005          | 1.52 (0.34–6.83)   | 0.588          | 6.58 (0.99–43.95) | 0.052          |
| LysoPE(16:1)          | 1.27 (0.38–4.30)   | 0.695          | 1.16 (0.50–2.73)   | 0.726          | 1.07 (0.26–4.45)   | 0.927          | 0.70 (0.18–2.73)  | 0.604          |
| LysoPE(18:0)          | 2.56 (0.65–10.11)  | 0.179          | 0.10 (0.02–0.44)   | 0.002          | 4.21 (0.79–22.39)  | 0.092          | 2.64 (0.36–19.31) | 0.338          |
| LysoPE(18:1)          | 0.57 (0.06–5.17)   | 0.618          | 0.80 (0.14–4.63)   | 0.806          | 0.07 (0.01–0.63)   | 0.017          | 0.30 (0.04–2.19)  | 0.233          |
| LysoPE(20:1)          | 0.71 (0.25–2.04)   | 0.521          | 1.14 (0.62–2.11)   | 0.679          | 0.33 (0.07–1.47)   | 0.147          | 1.37 (0.61–3.06)  | 0.444          |
| LysoPE(22:5)          | 0.78 (0.21–2.93)   | 0.714          | 2.47 (0.66–9.16)   | 0.179          | 5.38 (1.02–28.42)  | 0.048          | 0.10 (0.02–0.62)  | 0.013          |
| LysoPE(18:2)          | 1.06 (0.20–5.45)   | 0.948          | 2.41 (1.12–5.20)   | 0.024          | 1.59 (0.31–8.26)   | 0.580          | 0.50 (0.14–1.77)  | 0.286          |

|                                    |                     |       |                    |        |                   |       |                   |       |
|------------------------------------|---------------------|-------|--------------------|--------|-------------------|-------|-------------------|-------|
| Anatomic location = RCC (ref: LCC) | 1.05 (0.29–3.79)    | 0.941 | 0.09 (0.02–0.43)   | 0.002  | 1.11 (0.19–6.58)  | 0.909 | 1.00 (0.14–6.97)  | 1.000 |
| Clinical stage = late (ref: early) | 18.99 (2.31–155.90) | 0.006 | 15.45 (2.48–96.39) | 0.003  | 4.40 (0.24–79.55) | 0.316 | 2.49 (0.36–17.33) | 0.355 |
| Chemotherapy = Yes (ref: No)       | 0.84 (0.13–5.37)    | 0.853 | 0.83 (0.16–4.37)   | 0.827  | 2.24 (0.14–36.07) | 0.570 | 0.51 (0.08–3.33)  | 0.485 |
| Age                                | 1.10 (1.01–1.21)    | 0.038 | 1.30 (1.16–1.45)   | <0.001 | 1.05 (0.96–1.16)  | 0.278 | 0.86 (0.76–0.97)  | 0.018 |

Abbreviation: LysoPC, lysophosphatidylcholine; LysoPE, lysophosphatidylethanolamine. <sup>a</sup> All the variables listed were included in one multivariate Cox PH model. The abundance of each metabolite was treated as a continuous variable and was log<sub>2</sub> transformed.

**Table S11.** Multivariate analysis of association between metabolites in methionine metabolism and OS and RFS for all patients .

| Variable <sup>a</sup>              | OS                      |                             |                                      | RFS                     |                             |                                      |
|------------------------------------|-------------------------|-----------------------------|--------------------------------------|-------------------------|-----------------------------|--------------------------------------|
|                                    | HR (95% CI)             | <i>P</i> value <sup>a</sup> | Int. Sex <i>P</i> value <sup>b</sup> | HR (95% CI)             | <i>P</i> value <sup>a</sup> | Int. Sex <i>P</i> value <sup>b</sup> |
| <b>Dimethylglycine</b>             | <b>0.99 (0.64–1.52)</b> | <b>0.955</b>                | <b>0.390</b>                         | <b>0.74 (0.46–1.20)</b> | <b>0.228</b>                | 0.555                                |
| Methionine                         | 1.26 (0.73–2.19)        | 0.408                       | 0.045                                | 1.90 (1.01–3.57)        | 0.045                       | 0.022                                |
| S-adenosylhomocysteine (SAH)       | 0.96 (0.75–1.23)        | 0.751                       | 0.078                                | 0.96 (0.72–1.27)        | 0.753                       | 0.931                                |
| S-adenosylmethionine (SAM)         | 1.08 (0.88–1.31)        | 0.467                       | 0.355                                | 1.07 (0.86–1.32)        | 0.541                       | 0.765                                |
| Serine                             | 0.56 (0.34–0.92)        | 0.023                       | 0.039                                | 0.49 (0.29–0.83)        | 0.008                       | 0.045                                |
| Sex = Male (ref: Female)           | 2.02 (0.99–4.13)        | 0.054                       | –                                    | 1.14 (0.53–2.44)        | 0.740                       | –                                    |
| Anatomic location = RCC (ref: LCC) | 0.77 (0.38–1.58)        | 0.483                       | –                                    | 0.62 (0.28–1.37)        | 0.235                       | –                                    |
| Clinical stage = late (ref: early) | 5.32 (2.01–14.11)       | 0.001                       | –                                    | 1.88 (0.60–5.85)        | 0.277                       | –                                    |
| Chemotherapy = Yes (ref: No)       | 1.02 (0.40–2.61)        | 0.962                       | –                                    | 1.24 (0.41–3.77)        | 0.703                       | –                                    |
| Age                                | 1.10 (1.05–1.15)        | <0.001                      | –                                    | 0.96 (0.91–1.02)        | 0.189                       | –                                    |

<sup>a</sup> All the variables listed were included in one multivariate Cox PH model where the abundance of each metabolite was treated as a continuous variable and was log<sub>2</sub> transformed. <sup>b</sup> *P* value of the interaction between the metabolite and sex.

**Table S12.** Multivariate analysis of association between metabolites in methionine metabolism and OS and RFS by sex.

| Variable <sup>a</sup>              | OS                |         |                   |         | RFS               |         |                  |         |
|------------------------------------|-------------------|---------|-------------------|---------|-------------------|---------|------------------|---------|
|                                    | Females           |         | Males             |         | Females           |         | Males            |         |
|                                    | HR (95% CI)       | P value | HR (95% CI)       | P value | HR (95% CI)       | P value | HR (95% CI)      | P value |
| Dimethylglycine                    | 0.69 (0.33–1.42)  | 0.308   | 1.45 (0.77–2.74)  | 0.250   | 0.63 (0.29–1.36)  | 0.239   | 0.69 (0.33–1.46) | 0.331   |
| Methionine                         | 2.52 (0.27–23.62) | 0.419   | 1.30 (0.64–2.65)  | 0.465   | 5.49 (0.49–61.80) | 0.168   | 1.39 (0.62–3.10) | 0.423   |
| S-adenosylhomocysteine (SAH)       | 0.87 (0.56–1.36)  | 0.545   | 1.09 (0.76–1.58)  | 0.631   | 1.07 (0.67–1.72)  | 0.776   | 0.81 (0.54–1.21) | 0.304   |
| S-adenosylmethionine (SAM)         | 1.18 (0.78–1.78)  | 0.426   | 1.04 (0.80–1.36)  | 0.757   | 1.08 (0.72–1.62)  | 0.709   | 1.20 (0.90–1.60) | 0.211   |
| Serine                             | 0.48 (0.05–4.59)  | 0.527   | 0.37 (0.19–0.72)  | 0.004   | 0.31 (0.03–3.13)  | 0.322   | 0.49 (0.24–0.98) | 0.044   |
| Anatomic location = RCC (ref: LCC) | 1.32 (0.42–4.17)  | 0.636   | 0.58 (0.22–1.58)  | 0.289   | 0.81 (0.26–2.53)  | 0.714   | 0.43 (0.12–1.50) | 0.184   |
| Clinical stage = late (ref: early) | 9.44 (1.44–61.68) | 0.019   | 9.11 (2.22–37.39) | 0.002   | 2.25 (0.42–12.14) | 0.345   | 0.76 (0.13–4.39) | 0.764   |
| Chemotherapy = Yes (ref: No)       | 1.12 (0.24–5.18)  | 0.886   | 0.81 (0.23–2.82)  | 0.742   | 2.04 (0.39–10.71) | 0.398   | 1.67 (0.34–8.30) | 0.529   |
| Age                                | 1.06 (0.98–1.14)  | 0.134   | 1.16 (1.08–1.25)  | <0.001  | 0.97 (0.90–1.06)  | 0.541   | 0.93 (0.86–1.01) | 0.076   |

<sup>a</sup> All the variables listed were included in one multivariate Cox PH model. The abundance of each metabolite was treated as a continuous variable and was log<sub>2</sub> transformed.

**Table S13.** Multivariate analysis of association between metabolites in polyamine synthesis and OS and RFS for all patients .

| Variable <sup>a</sup>                                                     | OS                      |                             |                                      | RFS                     |                             |                                      |
|---------------------------------------------------------------------------|-------------------------|-----------------------------|--------------------------------------|-------------------------|-----------------------------|--------------------------------------|
|                                                                           | HR (95% CI)             | <i>P</i> value <sup>a</sup> | Int. Sex <i>P</i> value <sup>b</sup> | HR (95% CI)             | <i>P</i> value <sup>a</sup> | Int. Sex <i>P</i> value <sup>b</sup> |
| <b><i>N</i><sup>1</sup>, <i>N</i><sup>12</sup>-diacetylspermine (DAS)</b> | <b>0.87 (0.62–1.23)</b> | <b>0.439</b>                | <b>0.356</b>                         | <b>1.01 (0.68–1.50)</b> | <b>0.954</b>                | 0.336                                |
| Spermidine                                                                | 1.30 (0.64–2.63)        | 0.465                       | 0.594                                | 0.72 (0.34–1.53)        | 0.396                       | 0.329                                |
| Spermine                                                                  | 1.16 (0.83–1.62)        | 0.386                       | 0.082                                | 1.06 (0.76–1.49)        | 0.719                       | 0.933                                |
| <i>N</i> <sup>1</sup> -acetylspermine                                     | 1.07 (0.78–1.48)        | 0.675                       | 0.887                                | 1.24 (0.89–1.74)        | 0.203                       | 0.109                                |
| Ornithine                                                                 | 0.97 (0.54–1.74)        | 0.927                       | 0.105                                | 0.84 (0.51–1.39)        | 0.503                       | 0.206                                |
| Arginine                                                                  | 1.38 (0.83–2.27)        | 0.210                       | 0.070                                | 2.03 (1.14–3.60)        | 0.016                       | 0.037                                |
| Citrulline                                                                | 0.96 (0.69–1.34)        | 0.818                       | 0.002                                | 1.05 (0.73–1.51)        | 0.801                       | 0.023                                |
| Argininosuccinic acid                                                     | 0.69 (0.48–0.98)        | 0.039                       | 0.123                                | 0.72 (0.49–1.04)        | 0.081                       | 0.055                                |
| Sex = Male (ref: Female)                                                  | 2.15 (1.08–4.29)        | 0.030                       | –                                    | 1.17 (0.54–2.56)        | 0.690                       | –                                    |
| Anatomic location = RCC (ref: LCC)                                        | 0.81 (0.39–1.71)        | 0.584                       | –                                    | 0.65 (0.29–1.48)        | 0.306                       | –                                    |
| Clinical stage = late (ref: early)                                        | 6.11 (1.91–19.57)       | 0.002                       | –                                    | 1.93 (0.64–5.81)        | 0.242                       | –                                    |
| Chemotherapy = Yes (ref: No)                                              | 0.92 (0.28–2.95)        | 0.882                       | –                                    | 1.14 (0.36–3.63)        | 0.824                       | –                                    |
| Age                                                                       | 1.10 (1.05–1.15)        | <0.001                      | –                                    | 0.96 (0.90–1.01)        | 0.120                       | –                                    |

<sup>a</sup> All the variables listed were included in one multivariate Cox PH model where the abundance of each metabolite was treated as a continuous variable and was log<sub>2</sub> transformed. <sup>b</sup> *P* value of the interaction between the metabolite and sex.

**Table S14.** Multivariate analysis of association between metabolites in polyamine synthesis and OS and RFS by sex.

| Variable <sup>a</sup>                                    | OS                    |         |                   |         | RFS               |         |                   |         |
|----------------------------------------------------------|-----------------------|---------|-------------------|---------|-------------------|---------|-------------------|---------|
|                                                          | Females               |         | Males             |         | Females           |         | Males             |         |
|                                                          | HR (95% CI)           | P value | HR (95% CI)       | P value | HR (95% CI)       | P value | HR (95% CI)       | P value |
| N <sup>1</sup> , N <sup>12</sup> -diacetylspermine (DAS) | 2.45 (0.96–6.22)      | 0.059   | 0.66 (0.42–1.02)  | 0.060   | 1.10 (0.50–2.42)  | 0.813   | 1.07 (0.61–1.90)  | 0.812   |
| Spermidine                                               | 0.51 (0.15–1.67)      | 0.264   | 3.21 (1.04–9.93)  | 0.043   | 0.28 (0.09–0.91)  | 0.034   | 4.18 (1.03–16.96) | 0.045   |
| Spermine                                                 | 3.88 (1.50–10.06)     | 0.005   | 0.71 (0.43–1.18)  | 0.184   | 1.61 (0.90–2.88)  | 0.106   | 0.56 (0.32–1.00)  | 0.048   |
| N <sup>1</sup> -acetylspermine                           | 0.37 (0.16–0.86)      | 0.020   | 1.14 (0.74–1.75)  | 0.557   | 0.92 (0.46–1.83)  | 0.816   | 1.62 (0.99–2.63)  | 0.054   |
| Ornithine                                                | 0.64 (0.10–4.28)      | 0.646   | 0.78 (0.40–1.55)  | 0.481   | 0.41 (0.10–1.67)  | 0.213   | 0.86 (0.45–1.67)  | 0.660   |
| Arginine                                                 | 5.63 (1.33–23.78)     | 0.019   | 1.06 (0.54–2.08)  | 0.869   | 3.22 (1.14–9.13)  | 0.028   | 1.57 (0.74–3.34)  | 0.237   |
| Citrulline                                               | 2.57 (1.04–6.33)      | 0.040   | 0.73 (0.47–1.15)  | 0.178   | 1.24 (0.60–2.59)  | 0.561   | 0.88 (0.51–1.50)  | 0.630   |
| Argininosuccinic acid                                    | 0.57 (0.23–1.38)      | 0.212   | 0.74 (0.47–1.19)  | 0.214   | 1.20 (0.53–2.73)  | 0.667   | 0.43 (0.24–0.78)  | 0.005   |
| Anatomic location = RCC (ref: LCC)                       | 0.33 (0.06–1.69)      | 0.182   | 0.80 (0.31–2.08)  | 0.648   | 0.55 (0.14–2.08)  | 0.375   | 0.50 (0.15–1.69)  | 0.265   |
| Clinical stage = late (ref: early)                       | 119.96 (4.62–3116.09) | 0.004   | 3.56 (0.94–13.45) | 0.061   | 1.27 (0.19–8.70)  | 0.805   | 0.95 (0.20–4.60)  | 0.947   |
| Chemotherapy = Yes (ref: No)                             | 0.10 (0.01–1.50)      | 0.096   | 2.20 (0.56–8.66)  | 0.258   | 4.54 (0.59–34.72) | 0.145   | 1.14 (0.21–6.14)  | 0.878   |
| Age                                                      | 1.18 (1.05–1.33)      | 0.007   | 1.15 (1.07–1.23)  | <0.001  | 0.97 (0.87–1.08)  | 0.625   | 0.90 (0.82–0.98)  | 0.014   |

<sup>a</sup> All the variables listed were included in one multivariate Cox PH model. The abundance of each metabolite was treated as a continuous variable and was log<sub>2</sub> transformed.
